# Supplementary material for: Genome and time-of-day transcriptome of Wolffia australiana link morphological extreme minimization with un-gated plant growth
Source: bioRxiv or medRxiv preprint supplement (doi:10.1101/2020.03.31.018291), 2020-03-31
Supplement: Supplementary file [file media-3.pdf]

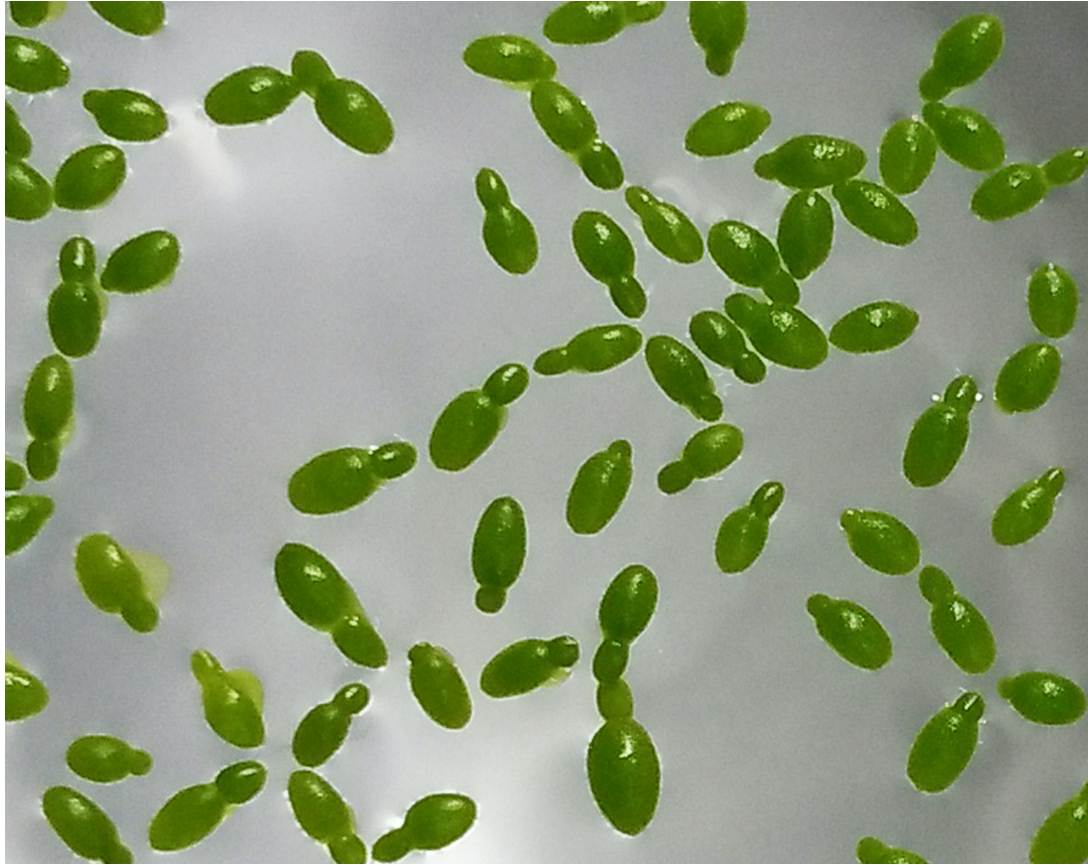

Figure S1. *Wolffia australiana* under growth assay.

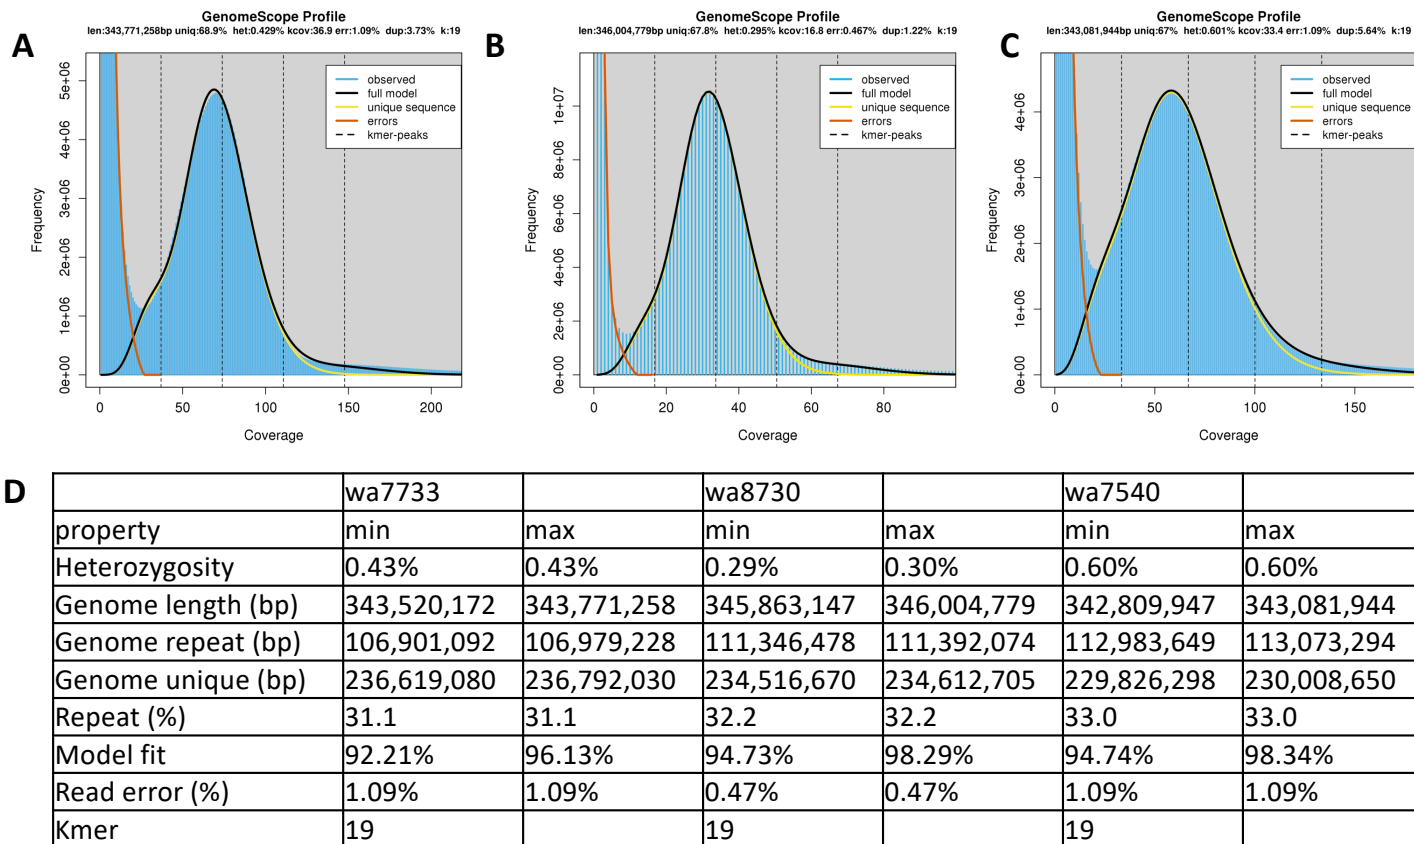

**Figure S2. Genome size estimated by Kmer (k=19) frequency.**

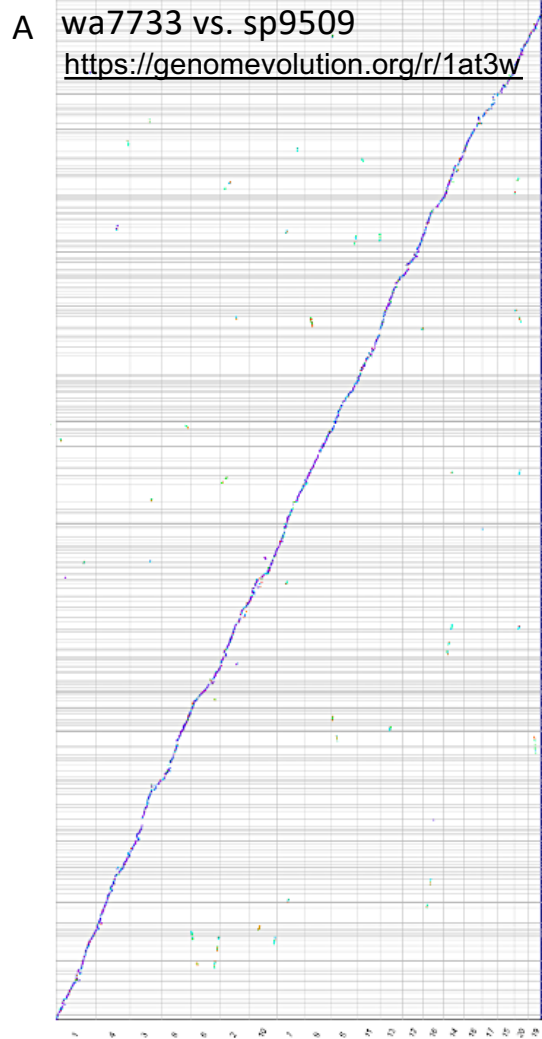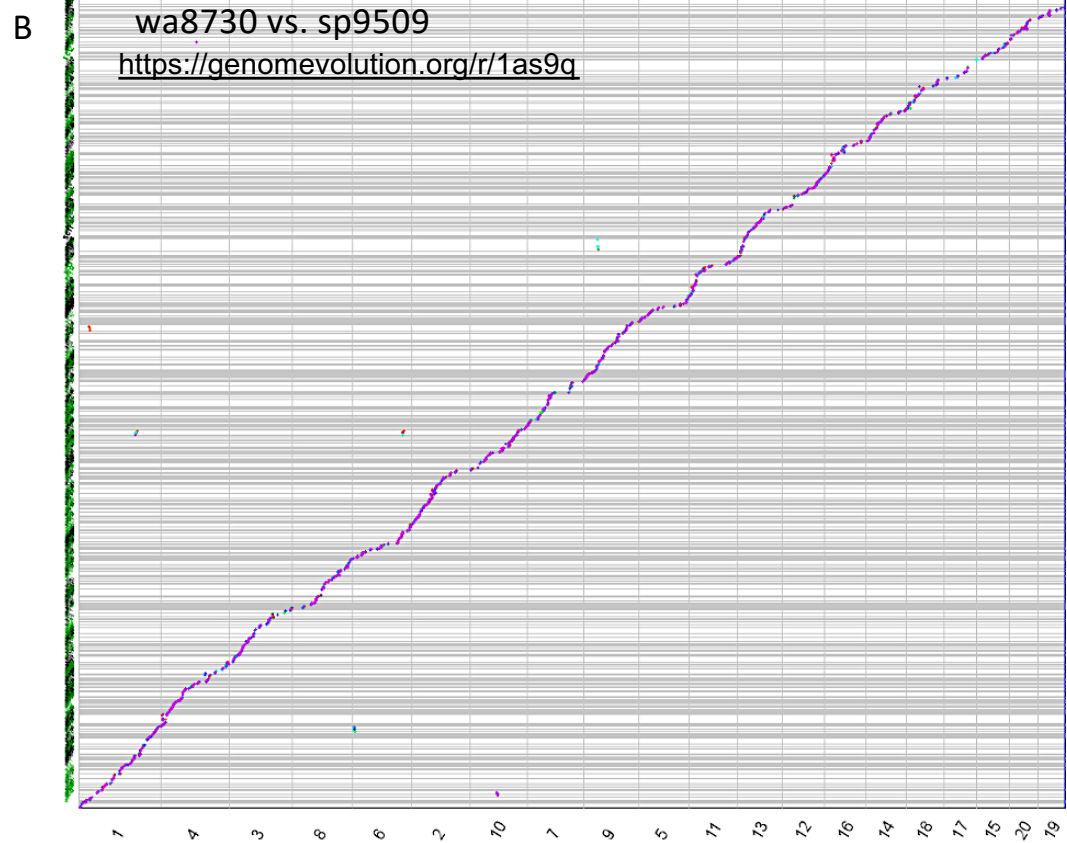

C

|                                       | wa7733 | wa8730 |
|---------------------------------------|--------|--------|
| Total gene level syntenic blocks (>5) | 814    | 518    |
| Average number of genes per block     | 10     | 7      |
| Minimum genes per block               | 5      | 5      |
| Maximum genes per block               | 92     | 21     |
| Total genes in syntenic blocks        | 7,936  | 3,622  |

Figure S3. Wolffia is colinear with sp9509.

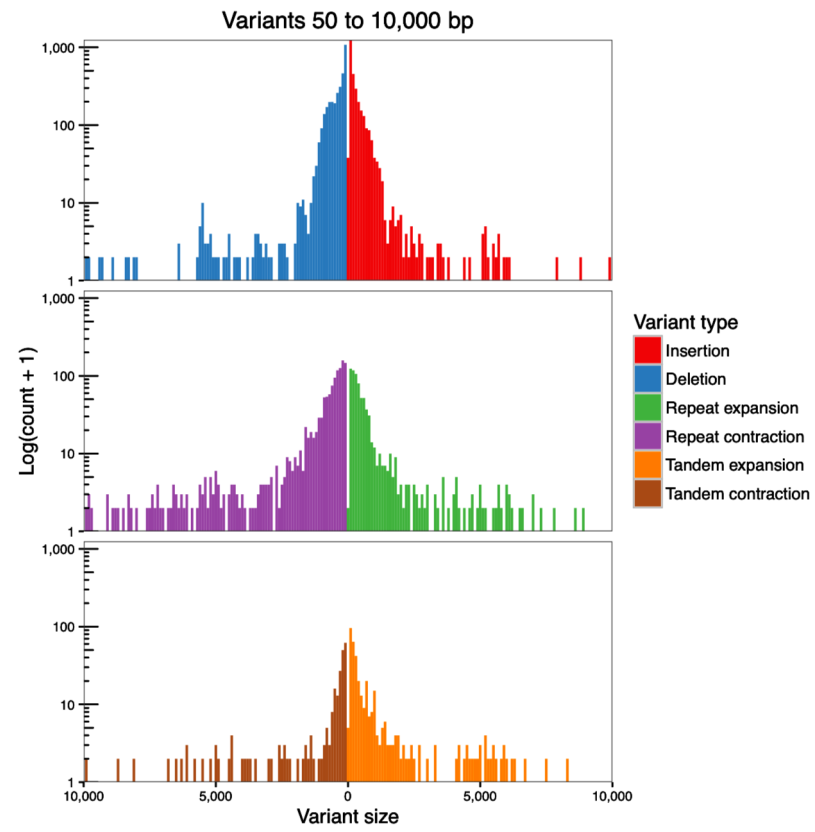

Figure S4. Wolffia genomes differ mostly by small INDELS.



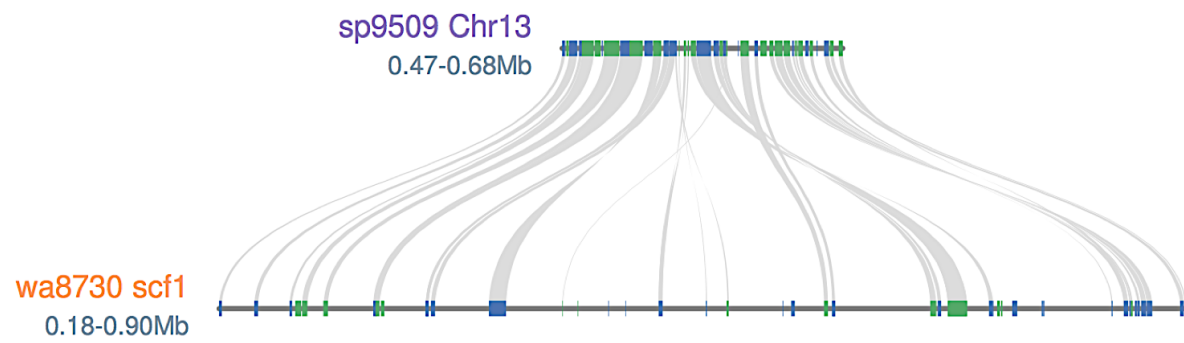

**Figure S5. Wolffia genome is colinear with sp9509.**



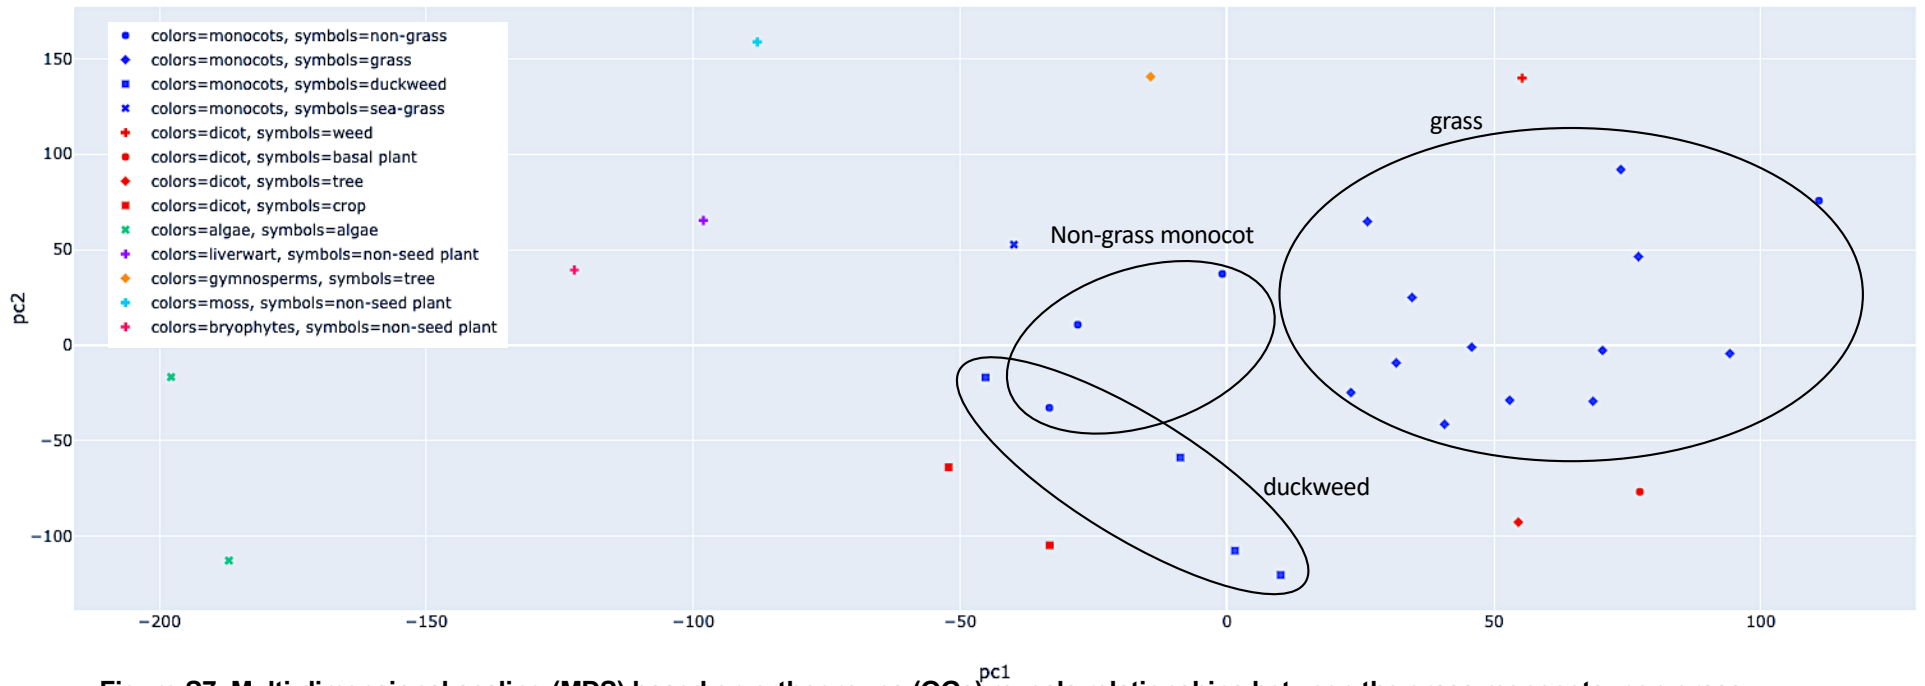

**Figure S7. Multi-dimensional scaling (MDS) based on orthogroups (OGs) reveals relationships between the grass monocots, non-grass monocots and duckweeds.**

|          | Wa7733 | Wa8730 | Sp9509 | Sp7498 | zostera | arabidopsis | rice | brachy | maize |
|----------|--------|--------|--------|--------|---------|-------------|------|--------|-------|
| 1        | 41     | 45     | 37     | 33     | 26      | 18          | 18   | 19     | 12    |
| 2        | 20     | 20     | 19     | 18     | 17      | 14          | 12   | 13     | 13    |
| 3        | 9      | 9      | 9      | 10     | 10      | 9           | 8    | 9      | 9     |
| 4        | 6      | 5      | 6      | 6      | 7       | 7           | 5    | 6      | 8     |
| 5        | 3      | 3      | 4      | 4      | 5       | 5           | 4    | 4      | 6     |
| 6        | 3      | 3      | 4      | 4      | 4       | 4           | 3    | 3      | 5     |
| 7        | 2      | 2      | 2      | 3      | 3       | 3           | 2    | 2      | 5     |
| 8        | 2      | 2      | 2      | 2      | 2       | 3           | 2    | 2      | 3     |
| 9        | 1      | 1      | 2      | 2      | 2       | 2           | 2    | 2      | 3     |
| 10       | 1      | 1      | 1      | 1      | 2       | 2           | 2    | 2      | 2     |
| 11-15'   | 3      | 3      | 4      | 4      | 6       | 7           | 6    | 6      | 7     |
| 16-20    | 2      | 2      | 2      | 2      | 2       | 4           | 3    | 4      | 5     |
| 21-50    | 3      | 2      | 3      | 4      | 4       | 8           | 8    | 8      | 9     |
| 51-100   | 1      | 1      | 1      | 1      | 1       | 2           | 3    | 3      | 2     |
| 101-150  | 1      | 1      | 0      | 0      | 1       | 1           | 2    | 1      | 1     |
| 151-200  | 0      | 0      | 1      | 1      | 0       | 0           | 0    | 0      | 1     |
| 201-500  | 0      | 0      | 0      | 0      | 0       | 0           | 0    | 0      | 1     |
| 501-1000 | 0      | 0      | 0      | 0      | 0       | 0           | 0    | 0      | 0     |
| 1001+    | 0      | 0      | 0      | 0      | 0       | 0           | 0    | 0      | 0     |

Figure S8. Wolffia and Spirodela genes found in small gene families (orthogroups).

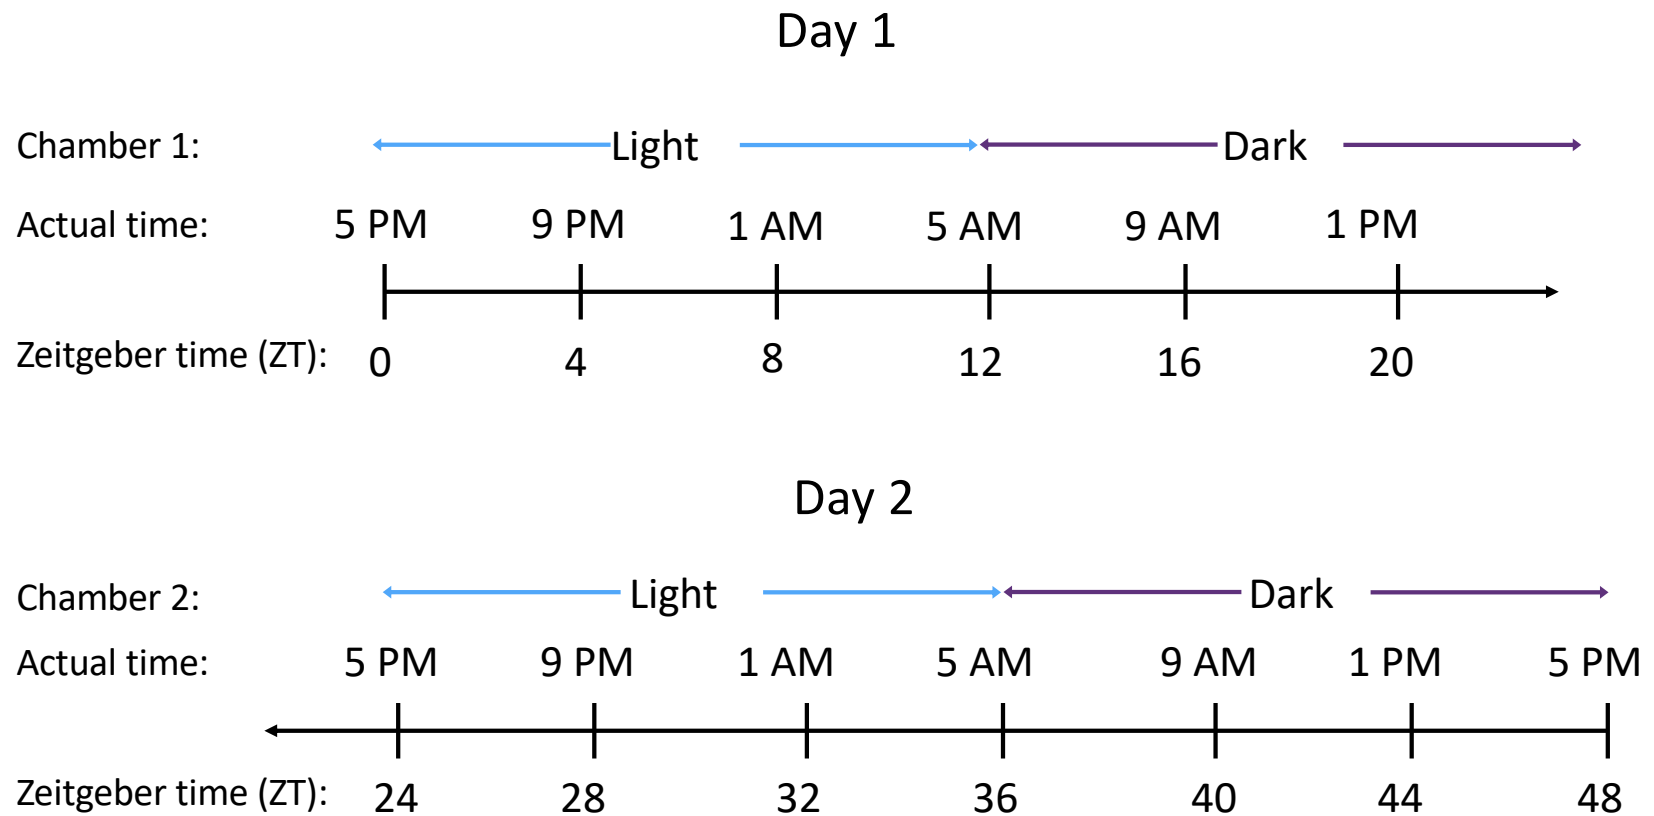

**Figure S9. Wolffia time course design.**

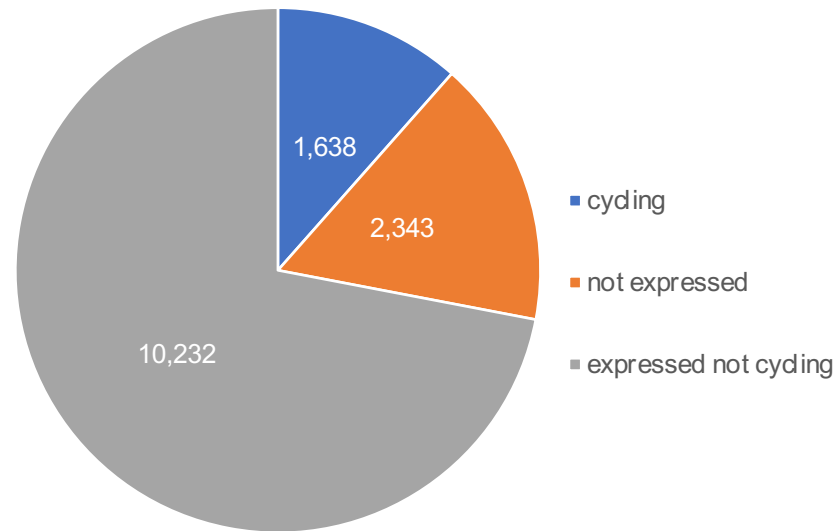

**Figure S10. Break down of expressed and cycling genes in wa8730.**

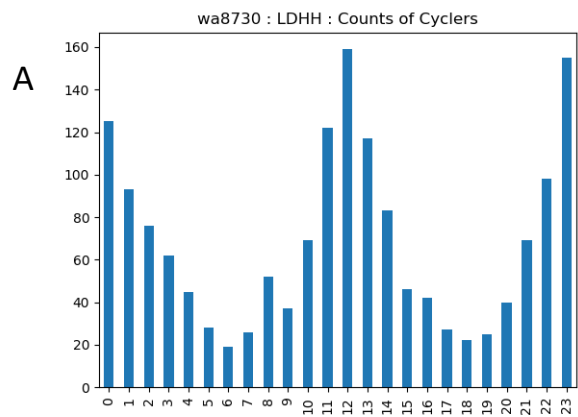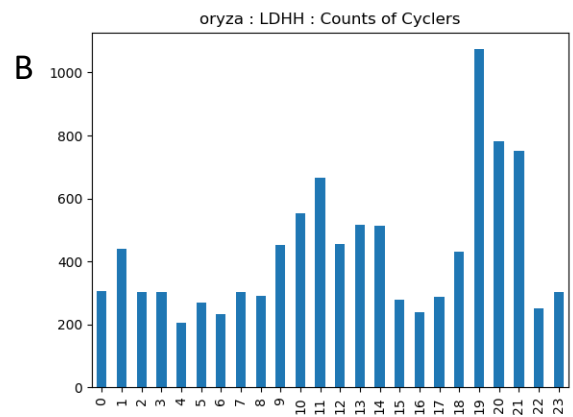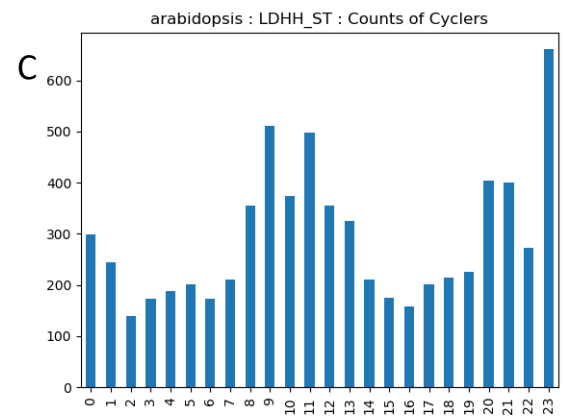

**Figure S11. Distribution of cycling genes over the day.**



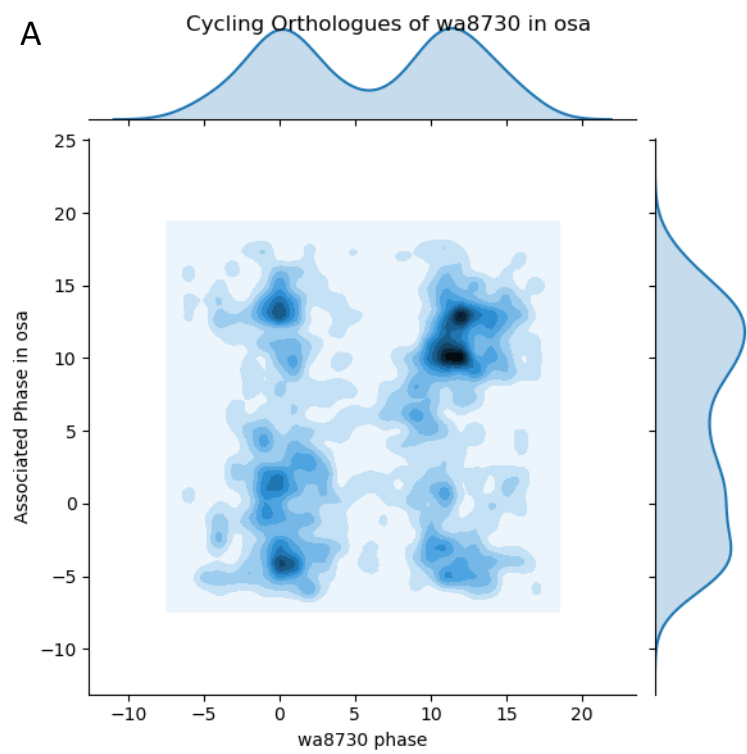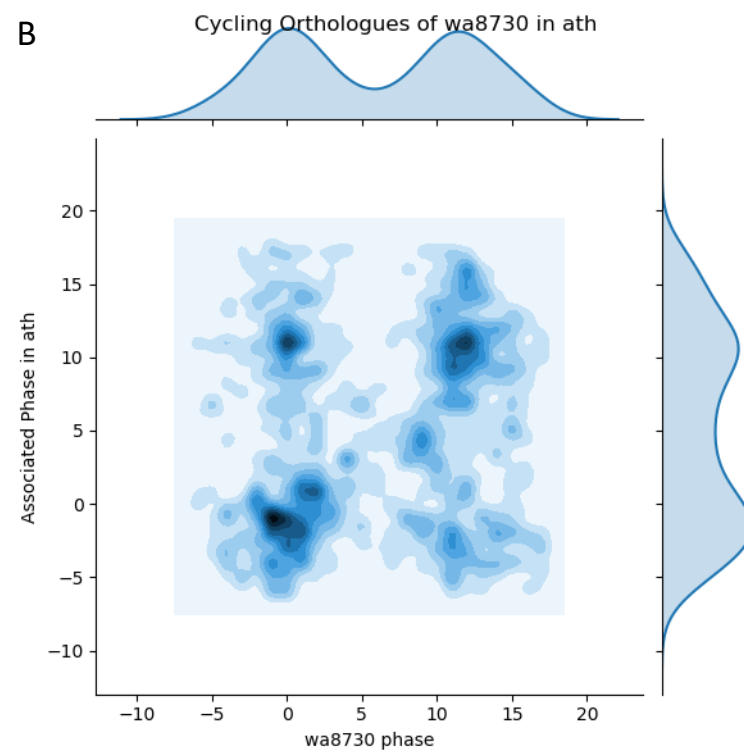

**Figure S12. Comparison of cycling genes between Wolffia (wa8730), Arabidopsis (ath) and rice (osa).**

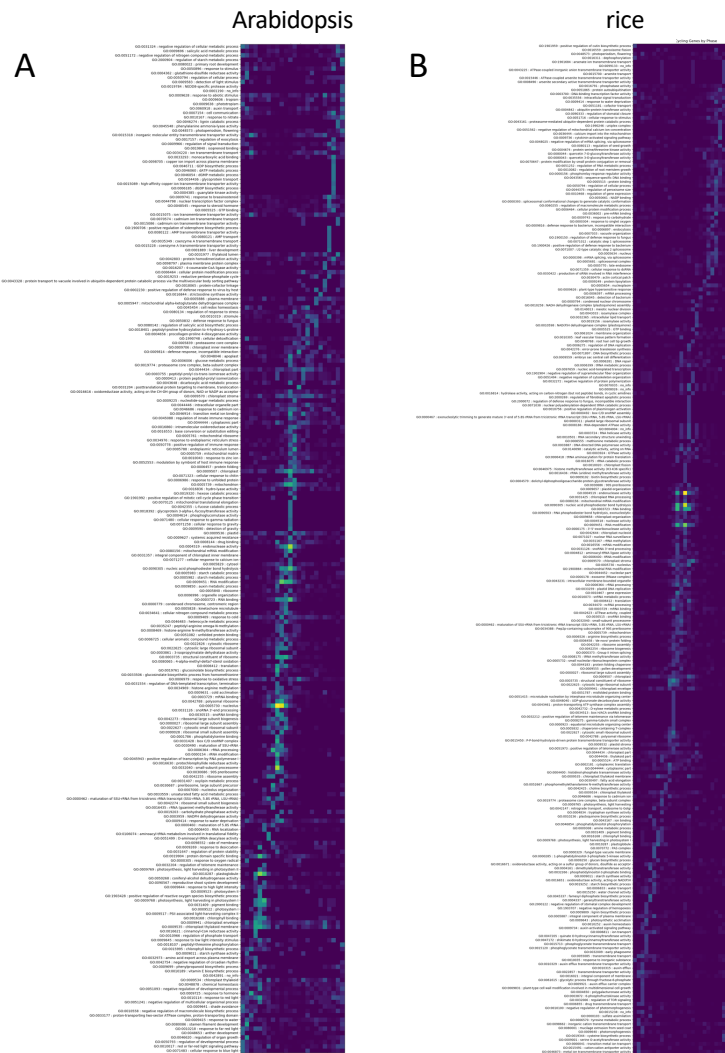

**Figure S13. Time of day (TOD) overrepresentation of GO terms in rice and Arabidopsis.**
